# Supplementary material
Source: PubMed Central journal article supplement (PMC3536099)
Supplement: AEM.02969-12_zam999103984so1.pdf [file AEM.02969-12_zam999103984so1.pdf]

## Supplementary materials

**Table S1:** Total ABE concentration, yield, and productivity obtained during batch ABE fermentation by *C. beijerinckii* NCIMB 8052

| Parameters (Max. values)   | Control     | CaCO <sub>3</sub> (4 g/L) treatment |
|----------------------------|-------------|-------------------------------------|
| Acetone (g/L)              | 3.1 ± 0.7   | 8.0 ± 0.3                           |
| Ethanol (g/L)              | 0.9 ± 0.2   | 1.1 ± 0.1                           |
| Butanol (g/L)              | 11.4 ± 0.8  | 16.3 ± 0.3                          |
| *Total ABE (g/L)           | 15.4 ± 1.8  | 25.5 ± 0.5                          |
| Initial glucose (g/L)      | 59.8 ± 1.0  | 65 ± 1.0                            |
| *Final glucose (g/L)       | 17.8 ± 1.0  | 0.0                                 |
| Cell density (540 nm)      | 6.1 ± 0.4   | 9.9 ± 0.4                           |
| *Cell Dry Weight (g/L)     | 3.5 ± 0.5   | 6.2 ± 0.5                           |
| Fermentation time (h)      | 72          | 60                                  |
| Total glucose utilized (g) | 42.0 ± 0.0  | 65 ± 1.0                            |
| ABE Yield (g/g)            | 0.37 ± 0.04 | 0.39 ± 0.00                         |
| ABE Productivity (g/L/h)   | 0.21 ± 0.03 | 0.42 ± 0.01                         |

\*The marked effects of CaCO<sub>3</sub> on *C. beijerinckii* during ABE fermentation

**Table S2A: Isoelectric points of solventogenic enzymes of *C. beijerinckii* NCIMB 8052**

| <b>Enzyme</b>                                  | <b>Isoelectric point</b>       |
|------------------------------------------------|--------------------------------|
| <i>Pflb</i> pyruvate-ferredoxin oxidoreductase | 5.8                            |
| <i>ak</i> acetate kinase                       | 5.1                            |
| <i>pta</i> phosphotrans acetylase              | 4.7                            |
| <i>adhE</i> aldehyde dehydrogenase             | 5.8                            |
| <i>bdhAB</i> alcohol dehydrogenase             | 5.5                            |
| <i>thl</i> thiolase                            | 5.8                            |
| <i>adc</i> acetoacetate decarboxylase          | 6.2                            |
| <i>ctfAB</i> CoA-transferase                   | subunit A 4.9<br>subunit B 6.9 |
| <i>hbd</i> 3-hydroxybutyryl-CoA dehydrogenase  | 5.3                            |
| <i>crt</i> crotonase                           | 5.5                            |
| <i>Bcd</i> butyryl-CoA dehydrogenase           | 5.3                            |
| <i>buk</i> butyrate kinase                     | 4.9                            |
| <i>ptb</i> phosphotransbutyrylase              | 9.2                            |

**Table S2B: Isoelectric points of annotated pathways in *C. beijerinckii* NCIMB 8052****Carbohydrate utilization genes: Glycolysis/Gluconeogenesis**

| <b>Gene/protein (Definition)</b>                 | <b>Isoelectric point</b> | <b>Note (Orthology)</b>                                   |
|--------------------------------------------------|--------------------------|-----------------------------------------------------------|
| Putative glucokinase, ROK family                 | 4.8                      | [EC:2.7.1.2]                                              |
| Glucose-6-phosphate isomerase                    | 4.9                      | [EC:5.3.1.9]                                              |
| 6-Phosphofructokinase                            | 5.4                      | [EC:2.7.1.11]                                             |
| Fructose-1,6-bisphosphatase                      | 6.1                      | fructose-1,6-bisphosphataseIII<br>[EC:3.1.3.11]           |
| Fructose-1,6-bisphosphate aldolase               | 5.6                      | fructose-bisphosphate aldolase, class I<br>[EC:4.1.2.13]  |
| Fructose-bisphosphate aldolase                   | 6.2                      | fructose-bisphosphate aldolase, class II<br>[EC:4.1.2.13] |
| Triosephosphate isomerase                        | 4.8                      | [EC:5.3.1.1]                                              |
| Glyceraldehyde-3-phosphate Dehydrogenase, type I | 5.3                      | [EC:1.2.1.12]                                             |
| Phosphoglycerate kinase                          | 4.9                      | [EC:2.7.2.3]                                              |
| Phosphoglyceromutase                             | 5.0                      | phosphoglycerate mutase [EC:5.4.2.1]                      |
| Phosphoglycerate mutase                          | 6.3                      | phosphoglycerate mutase [EC:5.4.2.1]                      |
| Phosphoglycerate mutase 1 family                 | 9.2                      | phosphoglycerate mutase [EC:5.4.2.1]                      |
| Phosphopyruvate hydratase                        | 4.4                      | enolase [EC:4.2.1.11]                                     |

|                                                                                             |     |                                                                                                                                                              |
|---------------------------------------------------------------------------------------------|-----|--------------------------------------------------------------------------------------------------------------------------------------------------------------|
| Pyruvate kinase                                                                             | 5.1 | [EC:2.7.1.40]                                                                                                                                                |
| L-Lactate dehydrogenase                                                                     | 4.9 | [EC:1.1.1.27]                                                                                                                                                |
| Iron-containing alcohol dehydrogenase (bifunctional acetaldehyde-CoA/alcohol dehydrogenase) | 5.5 | alcohol dehydrogenase [EC:1.1.1.1]<br>acetaldehyde dehydrogenase [EC:1.2.1.10]                                                                               |
| Aldose 1-epimerase                                                                          | 4.6 | [EC:5.1.3.3]                                                                                                                                                 |
| Glycoside hydrolase, family protein                                                         | 4.7 | 6-phospho-beta-glucosidase [EC:3.2.1.86]                                                                                                                     |
| 6-Phospho-beta-glucosidase                                                                  | 5.1 | [EC:3.2.1.86]                                                                                                                                                |
| PTS system, glucose subfamily, IIA subunit                                                  | 6.2 | PTS system, glucose-specific IIA component [EC:2.7.1.69]                                                                                                     |
| PTS system, alpha-glucoside-specific IIBC subunit                                           | 8.2 | PTS system, arbutin-like IIB component [EC:2.7.1.69]<br>PTS system, arbutin-like IIC component                                                               |
| Cellobiose/arbutin/salicin-specific PTS system components IIBC                              | 9.2 | PTS system, arbutin-, cellobiose-, and salicin-specific IIB component [EC:2.7.1.69]<br>PTS system, arbutin-, cellobiose-, and salicin-specific IIC component |

### Pentose phosphate pathway

| <b>Gene/protein (Definition)</b>                 | <b>Isoelectric point</b> | <b>Note (Orthology)</b>                        |
|--------------------------------------------------|--------------------------|------------------------------------------------|
| Glucose-6-phosphate isomerase                    | 4.9                      | [EC:5.3.1.9]                                   |
| Hypothetical protein                             | 5.6                      | 6-phosphogluconolactonase [EC:3.1.1.31]        |
| 6-Phosphogluconate dehydrogenase-like protein    | 5.1                      | 6-phosphogluconate dehydrogenase [EC:1.1.1.44] |
| Ribulose-phosphate 3-epimerase                   | 5.0                      | [EC:5.1.3.1]                                   |
| Transketolase, central region                    | 5.0                      | transketolase [EC:2.2.1.1]                     |
| Transketolase domain protein                     | 6.0                      | transketolase [EC:2.2.1.1]                     |
| Transketolase                                    | 5.2                      | transketolase [EC:2.2.1.1]                     |
| Putative transaldolase                           | 4.8                      | transketolase [EC:2.2.1.1]                     |
| Ribose 5-phosphate isomerase                     | 5.0                      | ribose 5-phosphate isomerase A [EC:5.3.1.6]    |
| Sugar-phosphate isomerase, RpiB/LacA/LacB family | 8.5                      | ribose 5-phosphate isomerase B [EC:5.3.1.6]    |
| Deoxyribose-phosphate aldolase                   | 6.8                      | [EC:4.1.2.4]                                   |

|                                                                               |     |                                                        |
|-------------------------------------------------------------------------------|-----|--------------------------------------------------------|
| Ribokinase                                                                    | 5.0 | [EC:2.7.1.15]                                          |
| Phosphopentomutase                                                            | 5.0 | [EC:5.4.2.7]                                           |
| Ribose-phosphate pyrophosphokinase                                            | 5.9 | [EC:2.7.6.1]                                           |
| Phosphoribosylpyrophosphate synthetase                                        | 5.9 | ribose-phosphate pyrophosphokinase [EC:2.7.6.1]        |
| 2-Dehydro-3-deoxyphosphogluconate aldolase /4-hydroxy-2-oxoglutarate aldolase | 6.5 | [EC:4.1.2.14 4.1.3.16]                                 |
| PfkB domain protein                                                           | 5.7 | 2-dehydro-3-deoxygluconokinase [EC:2.7.1.45]           |
| Fructose-1,6-bisphosphate aldolase                                            | 5.1 | fructose-bisphosphate aldolase, class II [EC:4.1.2.13] |
| Fructose-bisphosphate aldolase                                                | 6.2 | fructose-bisphosphate aldolase, class II [EC:4.1.2.13] |
| Fructose-1,6-bisphosphate aldolase                                            | 5.6 | fructose-bisphosphate aldolase, class I [EC:4.1.2.13]  |
| 6-Phosphofructokinase                                                         | 5.4 | [EC:2.7.1.11]                                          |
| Fructose-1,6-bisphosphatase                                                   | 6.1 | fructose-1,6-bisphosphatase III [EC:3.1.3.11]          |

### Pentose and glucuronate interconversions

| <b>Gene/protein (Definition)</b>                                              | <b>Isoelectric point</b> | <b>Note (Orthology)</b>                                            |
|-------------------------------------------------------------------------------|--------------------------|--------------------------------------------------------------------|
| 5-Keto-4-deoxyuronate isomerase                                               | 5.5                      | 4-deoxy-L-threo-5-hexosulose-uronate ketol-isomerase [EC:5.3.1.17] |
| 2-Deoxy-D-gluconate 3-dehydrogenase                                           | 5.9                      | [EC:1.1.1.125]                                                     |
| PfkB domain protein                                                           | 5.7                      | 2-dehydro-3-deoxygluconokinase [EC:2.7.1.45]                       |
| 2-Dehydro-3-deoxyphosphogluconate aldolase /4-hydroxy-2-oxoglutarate aldolase | 6.5                      | [EC:4.1.2.14 4.1.3.16]                                             |
| Glucuronate isomerase                                                         | 5.2                      | [EC:5.3.1.12]                                                      |
| Altronate oxidoreductase                                                      | 4.8                      | tagaturonate reductase [EC:1.1.1.58]                               |
| Altronate hydrolase                                                           | 5.5                      | [EC:4.2.1.7]                                                       |
| Mannonate dehydratase                                                         | 5.3                      | [EC:4.2.1.8]                                                       |
| Mannitol dehydrogenase, C-terminal domain                                     | 4.9                      | fructuronate reductase [EC:1.1.1.57]                               |
| UDP glucose 6-dehydrogenase                                                   | 5.9                      | [EC:1.1.1.22]                                                      |
| UTP--glucose-1-phosphate                                                      | 9.5                      | [EC:2.7.7.9]                                                       |

|                                      |     |                                                 |
|--------------------------------------|-----|-------------------------------------------------|
| uridylyltransferase                  |     |                                                 |
| L-Ribulose-5-phosphate 4-epimerase   | 5.2 | [EC:5.1.3.4]                                    |
| Ribulose-phosphate 3-epimerase       | 5.3 | [EC:5.1.3.1]                                    |
| Orotidine 5'-phosphate decarboxylase | 4.8 | 3-hexulose-6-phosphate synthase<br>[EC:4.1.2.-] |
| L-Arabinose isomerase                | 5.1 | [EC:5.3.1.4]                                    |
| Xylose isomerase                     | 5.0 | [EC:5.3.1.5]                                    |
| Rhamnulokinase                       | 5.1 | [EC:2.7.1.5]                                    |
| Rhamnulose-1-phosphate aldolase      | 5.5 | [EC:4.1.2.19]                                   |

### Fructose and mannose metabolism

| <b>Gene/protein (Definition)</b>                         | <b>Isoelectric point</b> | <b>Note (Orthology)</b>                                   |
|----------------------------------------------------------|--------------------------|-----------------------------------------------------------|
| ROK family protein                                       | 5.4                      | fructokinase [EC:2.7.1.4]                                 |
| Ribokinase-like domain-containing protein                | 4.6                      | fructokinase [EC:2.7.1.4]                                 |
| Mannose-6-phosphate isomerase, class I                   | 4.9                      | mannose-6-phosphate isomerase<br>[EC:5.3.1.8]             |
| Rhamnulokinase                                           | 4.9                      | [EC:2.7.1.5]                                              |
| Rhamnulose-1-phosphate aldolase                          | 5.5                      | [EC:4.1.2.19]                                             |
| 6-Phosphofructokinase                                    | 5.4                      | [EC:2.7.1.11]                                             |
| Fructose-1,6-bisphosphatase                              | 6.1                      | fructose-1,6-bisphosphatase III<br>[EC:3.1.3.11]          |
| Mannitol dehydrogenase, C-terminal domain                | 4.9                      | mannitol-1-phosphate 5-dehydrogenase<br>[EC:1.1.1.17]     |
| Sorbitol-6-phosphate 2-dehydrogenase                     | 6.4                      | [EC:1.1.1.140]                                            |
| 1-Phosphofructokinase                                    | 5.3                      | [EC:2.7.1.56]                                             |
| Xylose isomerase                                         | 5.0                      | [EC:5.3.1.5]                                              |
| Fructose-1,6-bisphosphate aldolase, class II             | 5.6                      | fructose-bisphosphate aldolase, class II<br>[EC:4.1.2.13] |
| Fructose-bisphosphate aldolase, class II                 | 6.2                      | [EC:4.1.2.13]                                             |
| Fructose-bisphosphate aldolase, class I                  | 6.2                      | [EC:4.1.2.13]                                             |
| Triosephosphate isomerase                                | 4.8                      | (EC:5.3.1.1)                                              |
| PTS system, fructose subfamily, IIC subunit              | 6.6                      |                                                           |
| PTS system, mannose/fructose/sorbose family, IIA subunit | 6.1                      |                                                           |
| Phosphotransferase system PTS,                           | 4.8                      |                                                           |

|                                                                       |     |                                                           |
|-----------------------------------------------------------------------|-----|-----------------------------------------------------------|
| sorbose-Specific IIC subunit                                          |     |                                                           |
| PTS system, mannose/fructose/sorbose family, IIC subunit              | 5.7 | PTS system, mannose-specific IIC component                |
| PTS system, mannose/fructose/sorbose family, IID subunit              | 9.9 | PTS system, mannose-specific IID component                |
| Phosphoenolpyruvate-dependent sugar Phosphotransferase system, EIIA 2 | 6.3 | PTS system, mannitol-specific IIA component [EC:2.7.1.69] |
| PTS system, mannitol-specific IIC subunit                             | 8.6 |                                                           |
| PTS system, glucitol/sorbitol-specific IIA subunit                    | 4.7 | PTS system, glucitol/sorbitol-specific IIA component      |
| PTS system, glucitol/sorbitol-specific, IIBC subunit                  | 8   |                                                           |
| PTS system, glucitol/sorbitol-specific, IIC subunit                   | 9.4 | PTS system, glucitol/sorbitol-specific IIC component      |

### Galactose metabolism

| <b>Gene/protein (Definition)</b>                                   | <b>Isoelectric point</b> | <b>Note (Orthology)</b>                                                |
|--------------------------------------------------------------------|--------------------------|------------------------------------------------------------------------|
| Galactokinase                                                      | 5.0                      | [EC:2.7.1.6]                                                           |
| UTP--glucose-1-phosphate uridylyltransferase                       | 9.5                      | [EC:2.7.7.9]                                                           |
| Putative glucokinase, ROK family                                   | 4.8                      | glucokinase [EC:2.7.1.2]                                               |
| Glycoside hydrolase family 2, TIM barrel                           | 5.2                      | beta-galactosidase [EC:3.2.1.23]                                       |
| Glycoside hydrolase, family 4                                      | 7.0                      | alpha-galactosidase [EC:3.2.1.22]                                      |
| Putative PTS IIA-like nitrogen-regulatory protein, PtsN            | 5.1                      | PTS system, galactitol-specific IIA component                          |
| Phosphotransferase system, lactose/cellobiose-specific IIB subunit | 6.2                      | PTS system, galactitol-specific IIB component [EC:2.7.1.69]            |
| PTS system, galactitol-specific IIB component, putative            | 5.4                      | PTS system, galactitol-specific IIB component [EC:2.7.1.69]            |
| PTS system galactitol-specific IIC component                       | 9.1                      | PTS system galactitol-specific IIC component                           |
| 6-Phosphofructokinase                                              | 5.4                      | [EC:2.7.1.11]                                                          |
| PTS system fructose subfamily IIA component                        | 6.1                      | PTS system, N-acetylgalactosamine-specific IIA component [EC:2.7.1.69] |

|                                                                   |     |                                                                |
|-------------------------------------------------------------------|-----|----------------------------------------------------------------|
| N-acetylgalactosamine-specific PTS system transporter subunit IIB | 6.8 | PTS system, galactosamine-specific IIB component [EC:2.7.1.69] |
| N-acetylgalactosamine-specific PTS system transporter subunit IIC | 4.6 | PTS system, galactosamine-specific IIC component               |
| N-acetylgalactosamine-specific PTS system transporter subunit IID | 9.4 | PTS system, galactosamine-specific IID component               |

### Starch and sucrose metabolism

| <b>Gene/protein (Definition)</b>                                | <b>Isoelectric point</b> | <b>Note (Orthology)</b>                                  |
|-----------------------------------------------------------------|--------------------------|----------------------------------------------------------|
| Phosphotransferase system, EIIC                                 | 9.5                      |                                                          |
| Beta-glucosidase                                                | 5.0                      | [EC:3.2.1.21]                                            |
| Alpha-phosphotrehalase                                          | 4.8                      | trehalose-6-phosphate hydrolase [EC:3.2.1.93]            |
| PTS system, glucose subfamily, IIA subunit                      | 6.2                      | PTS system, glucose-specific IIA component [EC:2.7.1.69] |
| PTS system, trehalose-specific IIBC subunit                     | 9.6                      |                                                          |
| UDP-glucose 6-dehydrogenase                                     | 5.3                      | [EC:1.1.1.22]                                            |
| UTP--glucose-1-phosphate uridylyltransferase                    | 9.5                      | [EC:2.7.7.9]                                             |
| Putative glucokinase, ROK family                                | 4.8                      | glucokinase [EC:2.7.1.2]                                 |
| Glucose-6-phosphate isomerase                                   | 4.9                      | [EC:5.3.1.9]                                             |
| ROK family protein                                              | 5.4                      | fructokinase [EC:2.7.1.4]                                |
| PfkB domain protein (ribokinase-like domain-containing protein) | 5.7                      | fructokinase [EC:2.7.1.4]                                |
| Glucose-1-phosphate adenylyltransferase, GlgD subunit           | 7.1                      | glucose-1-phosphate adenylyltransferase [EC:2.7.7.27]    |
| Glucose-1-phosphate adenylyltransferase                         | 5.0                      | glucose-1-phosphate adenylyltransferase [EC:2.7.7.27]    |
| Glycogen/starch synthase, ADP-glucose type                      | 5.0                      | starch synthase [EC:2.4.1.21]                            |
| 1,4-alpha-glucan branching enzyme                               | 5.2                      | [EC:2.4.1.18]                                            |
| Glycogen/starch/alpha-glucan phosphorylase                      | 6.5                      | starch phosphorylase [EC:2.4.1.1]                        |
| 4-Alpha-glucanotransferase                                      | 4.9                      | [EC:2.4.1.25]                                            |
| Glycoside hydrolase, family 4                                   | 7.0                      | maltose-6'-phosphate glucosidase [EC:3.2.1.122]          |

### Aminosugars metabolism

| <b>Gene/protein (Definition)</b>                                 | <b>Isoelectric point</b> | <b>Note (Orthology)</b>                                |
|------------------------------------------------------------------|--------------------------|--------------------------------------------------------|
| Glucosamine-6-phosphate isomerase                                | 5.5                      | glucosamine-6-phosphate deaminase [EC:3.5.99.6]        |
| Glucosamine--fructose-6-phosphate aminotransferase (isomerizing) | 4.8                      | [EC:2.6.1.16]                                          |
| N-acetylglucosamine-6-phosphate deacetylase                      | 4.9                      | [EC:3.5.1.25]                                          |
| UDP-N-acetylglucosamine pyrophosphorylase                        | 6.0                      | bifunctional protein GlmU [EC:2.7.7.23 2.3.1.157]      |
| UDP-N-acetylglucosamine 2-epimerase                              | 5.7                      | [EC:5.1.3.14]                                          |
| PTS system, N-acetylglucosamine-specific IIBC subunit            | 9.0                      |                                                        |
| PTS system, glucose subfamily, IIA subunit                       | 6.2                      |                                                        |
| Glucokinase regulatory-like protein                              | 5.6                      | N-acetylmuramic acid 6-phosphate etherase [EC:4.2.-.-] |
| Phosphoglucosamine mutase                                        | 4.6                      | [EC:5.4.2.10]                                          |
| Glycoside hydrolase, family 18                                   | 5.4                      | chitinase [EC:3.2.1.14]                                |
| UDP-N-acetylglucosamine 1-carboxyvinyltransferase                | 6.4                      | [EC:2.5.1.7]                                           |
| MurB, UDP-N-acetylenolpyruvoylglucosamine reductase              | 5.6                      | UDP-N-acetylmuramate dehydrogenase [EC:1.1.1.158]      |

### Pyruvate metabolism

| <b>Gene/protein (Definition)</b>                                                             | <b>Isoelectric point</b> | <b>Note (Orthology)</b>                                                     |
|----------------------------------------------------------------------------------------------|--------------------------|-----------------------------------------------------------------------------|
| Pyruvate formate-lyase                                                                       | 5.5                      | formate C-acetyltransferase [EC:2.3.1.54]                                   |
| Formate acetyltransferase                                                                    | 5.5                      | formate C-acetyltransferase [EC:2.3.1.54]                                   |
| Iron-containing alcohol dehydrogenase (Bifunctional acetaldehyde-CoA/alcohol dehydrogenase ) | 5.6                      | alcohol dehydrogenase [EC:1.1.1.1] acetaldehyde dehydrogenase [EC:1.2.1.10] |
| Aldehyde dehydrogenase                                                                       | 5.5                      |                                                                             |
| Acetate kinase                                                                               | 5.1                      | [EC:2.7.2.1]                                                                |
| Pyruvate kinase                                                                              | 5.1                      | [EC:2.7.1.40]                                                               |



|                                                             |     |                                                                                                     |
|-------------------------------------------------------------|-----|-----------------------------------------------------------------------------------------------------|
| Acetyl-CoA carboxylase, carboxyl transferase, alpha subunit | 7.3 | acetyl-CoA carboxylase carboxyl transferase subunit alpha [EC:6.4.1.2]                              |
| Acetyl-CoA carboxylase biotin carboxyl carrier protein      | 4.5 |                                                                                                     |
| Biotin carboxylase                                          | 5.5 | biotin carboxylase [EC:6.3.4.14]<br>acetyl-CoA carboxylase, biotin carboxylase subunit [EC:6.4.1.2] |
| Acetyl-CoA carboxylase, carboxyl transferase, beta subunit  | 5.6 | acetyl-CoA carboxylase carboxyl transferase subunit beta [EC:6.4.1.2]                               |
| Acylphosphatase                                             | 8.7 | [EC:3.6.1.7]                                                                                        |
| L-lactate dehydrogenase                                     | 4.8 | [EC:1.1.1.27]                                                                                       |
| D-isomer specific 2-hydroxyacid dehydrogenase, NAD-binding  | 5.0 | D-lactate dehydrogenase [EC:1.1.1.28]                                                               |
| L-1,2-propanediol oxidoreductase                            | 4.7 | lactaldehyde reductase [EC:1.1.1.77]                                                                |
| Methylglyoxal synthase                                      | 7.8 | [EC:4.2.3.3]                                                                                        |
| Carboxynorspermidine decarboxylase                          | 5.1 |                                                                                                     |
| Malate dehydrogenase (oxaloacetate-decarboxylating)         | 4.7 | [EC:1.1.1.38]                                                                                       |
| Pyruvate carboxylase                                        | 5.5 | pyruvate carboxylase subunit A [EC:6.4.1.1]<br>pyruvate carboxylase subunit B [EC:6.4.1.1]          |
| Pyruvate phosphate dikinase                                 | 4.8 | pyruvate, orthophosphate dikinase [EC:2.7.9.1]                                                      |
| Phosphoenolpyruvate synthase                                | 5.9 | pyruvate, water dikinase [EC:2.7.9.2]                                                               |
| Pyruvate phosphate dikinase, PEP/pyruvate-binding           | 8.2 | pyruvate, water dikinase [EC:2.7.9.2]                                                               |
| Acetyl-CoA acetyltransferase                                | 6.1 | [EC:2.3.1.9]                                                                                        |
| 2-Isopropylmalate synthase                                  | 6.0 | [EC:2.3.3.13]                                                                                       |
| aksA Trans-homoaconitate synthase                           | 5.8 | homocitrate synthase [EC:2.3.3.14]<br>homocitrate synthase NifV                                     |
| Homocitrate synthase                                        | 5.4 | homocitrate synthase [EC:2.3.3.14]<br>homocitrate synthase NifV                                     |

### Motility and chemotaxis genes/proteins: Bacterial chemotaxis

| Gene/protein (Definition)                      | Isoelectric point | Note (Orthology)                    |
|------------------------------------------------|-------------------|-------------------------------------|
| Methyl-accepting chemotaxis sensory transducer | 4.8               | methyl-accepting chemotaxis protein |
| CheA signal transduction histidine             | 5.0               | two-component system, chemotaxis    |

|                                                           |     |                                                                                                                   |
|-----------------------------------------------------------|-----|-------------------------------------------------------------------------------------------------------------------|
| kinase                                                    |     | family, sensor kinase, CheA, [EC:2.7.13.3]                                                                        |
| Putative CheW protein                                     | 5.0 | purine-binding chemotaxis protein CheW                                                                            |
| CheC domain protein                                       | 4.2 | chemotaxis protein CheX                                                                                           |
| CheD                                                      | 9.2 | chemotaxis protein CheD, [EC:3.5.1.44]                                                                            |
| Protein-glutamate O-methyltransferase                     | 5.2 | chemotaxis protein methyltransferase CheR [EC:2.1.1.80]                                                           |
| Response regulator receiver modulated CheB methylesterase | 8.8 | protein-glutamate methylesterase, two-component system, chemotaxis family, response regulator CheB, [EC:3.1.1.61] |
| Response regulator receiver protein                       | 6.9 | two-component system, chemotaxis family, response, regulator CheY                                                 |
| Putative CheW protein                                     | 5.0 | two-component system, chemotaxis family, response, regulator CheV                                                 |
| FliG, flagellar motor switch protein G                    | 4.8 |                                                                                                                   |
| Flagellar motor switch protein FliM                       | 4.6 |                                                                                                                   |
| Flagellar motor switch protein                            | 4.1 | flagellar motor switch protein FliN/FliY                                                                          |
| MotA/TolQ/ExbB proton channel                             | 4.8 | chemotaxis protein MotA                                                                                           |
| Flagellar motor protein MotA                              | 5.0 | chemotaxis protein MotA                                                                                           |
| OmpA/MotB domain protein                                  | 5.0 | chemotaxis protein MotB                                                                                           |

### Flagellar genes/proteins

| Gene/protein (Definition)                              | Isoelectric point | Note (Orthology)                         |
|--------------------------------------------------------|-------------------|------------------------------------------|
| FlhA , flagellar biosynthesis protein A                | 4.7               |                                          |
| FliR/FlhB, bifunctional flagellar Biosynthesis protein | 9.2               |                                          |
| Export protein FliQ, family 3                          | 8.2               | flagellar biosynthetic protein FliQ      |
| FliP, flagellar biosynthetic protein                   | 5.0               | EC:3.1.1.3                               |
| Putative flagellar formation protein                   | 9.4               | flagellar protein FliO/FliZ              |
| Flagellar motor switch protein                         | 4.1               | flagellar motor switch protein FliN/FliY |
| FliM, flagellar motor switch protein                   | 4.6               |                                          |
| OmpA/MotB domain protein                               | 5.4               | chemotaxis protein MotB                  |
| MotA/TolQ/ExbB proton channel                          | 4.8               | chemotaxis protein MotA                  |
| MotA, flagellar motor protein                          | 5.1               |                                          |

|                                                                       |     |                                                    |
|-----------------------------------------------------------------------|-----|----------------------------------------------------|
| Protein of unknown function DUF1078 domain protein                    | 4.9 | flagellar hook protein FlgE                        |
| Flagellar hook capping protein                                        | 4.6 | flagellar basal-body rod modification protein FlgD |
| FliJ, flagellar export protein                                        | 9.3 |                                                    |
| Flagellar protein export ATPase FliI                                  | 5.4 | [EC:3.6.3.14] flagellum-specific ATP synthase      |
| FliH, flagellar biosynthesis/type III secretory pathway -like protein | 5.3 | flagellar assembly protein FliH                    |
| FliG, flagellar motor switch protein G                                | 4.8 |                                                    |
| FliF, flagellar MS-ring protein                                       | 5.4 |                                                    |
| FliE, flagellar hook-basal body complex subunit                       | 4.8 |                                                    |
| FlgC, flagellar basal body rod protein                                | 6.6 |                                                    |
| FlgB, flagellar basal body rod protein                                | 8.8 |                                                    |
| FlgM, anti-sigma-28 factor                                            | 9.2 | negative regulator of flagellin synthesis FlgM     |
| FlgG, flagellar basal body rod protein                                | 4.7 |                                                    |
| FlgK, flagellar hook-associated protein                               | 5.0 |                                                    |
| FlgL, flagellar hook-associated protein 3                             | 4.8 | flagellar hook-associated protein 3 FlgL           |
| Flagellin domain protein                                              | 5.1 |                                                    |
| Flagellar hook-associated 2 domain protein                            | 5.3 |                                                    |
| Flagellar protein FliS                                                | 6.6 |                                                    |

### Stress response genes/proteins

| Stress response genes (Definition)                                             | Isoelectric point |
|--------------------------------------------------------------------------------|-------------------|
| Ferric uptake regulator family protein<br>(Peroxide stress response regulator) | 8.5               |
| Stress responsive alpha-beta barrel domain protein                             | 5.6               |
| Heat shock protein DnaJ domain-containing protein                              | 9.3               |
| Heat shock protein Hsp20                                                       | 5.3               |
| Heat shock protein 90                                                          | 5.0               |

### Fatty acids metabolism genes/proteins: Fatty acid biosynthesis

| Gene/protein (Definition) | Isoelectric point | Note (Orthology) |
|---------------------------|-------------------|------------------|
|---------------------------|-------------------|------------------|

|                                                             |     |                       |
|-------------------------------------------------------------|-----|-----------------------|
| Biotin carboxylase                                          | 5.7 | [EC:6.3.4.14 6.4.1.2] |
| Acetyl-CoA carboxylase, biotin carboxylase                  | 5.7 | [EC:6.3.4.14 6.4.1.2] |
| Acetyl-CoA carboxylase, carboxyl transferase, alpha subunit | 7.3 | [EC:6.4.1.2]          |
| Acetyl-CoA carboxylase, carboxyl transferase, beta subunit  | 5.6 | [EC:6.4.1.2]          |
| Acetyl-CoA carboxylase, biotin carboxyl carrier protein     | 4.5 |                       |
| Malonyl CoA-acyl carrier protein transacylase               | 5.4 | [EC:2.3.1.39]         |
| Beta-ketoacyl synthase-like protein                         | 5.4 | [EC:2.3.1.179]        |
| 3-Oxoacyl-(acyl-carrier-protein) synthase III               | 5.3 | [EC:2.3.1.180]        |
| Beta-ketoacyl-acyl-carrier-protein synthase I               | 5.1 | [EC:2.3.1.180]        |
| FabG, 3-ketoacyl-(acyl-carrier-protein) reductase           | 8.3 | [EC:1.1.1.100]        |
| Short-chain dehydrogenase/reductase SDR                     | 5.8 | [EC:1.1.1.100]        |
| Beta-hydroxyacyl-(acyl-carrier-protein) dehydratase FabZ    | 8.5 | [EC:4.2.1.-]          |
| 2-Nitropropane dioxygenase, NPD                             | 6.6 | [EC:1.3.1.-]          |

### Fatty acid metabolism

| Gene/protein (Definition)             | Isoelectric point | Note (Orthology)      |
|---------------------------------------|-------------------|-----------------------|
| Acetyl-CoA acetyltransferase          | 6.1               | [EC:2.3.1.9]          |
| Enoyl-CoA hydratase/isomerase         | 5.5               | [EC:4.2.1.17]         |
| Iron-containing alcohol dehydrogenase | 5.5               | [EC:1.1.1.1 1.2.1.10] |

### Sporulation genes/proteins

| Gene/ protein (Definition)                                        | Isoelectric point | Note (Orthology)                                 |
|-------------------------------------------------------------------|-------------------|--------------------------------------------------|
| SpoVG family protein                                              | 5.1               | stage V sporulation protein G                    |
| AbrB family transcriptional regulator (SpoVT/AbrB domain protein) | 7.6               | stage V sporulation protein T                    |
| Sporulation stage II, protein E                                   | <b>6.4</b>        | [EC:3.1.3.16]                                    |
| RNA polymerase factor sigma-70                                    | 8.8               | RNA polymerase sporulation-specific sigma factor |
| Sporulation stage II, protein R                                   | 6.6               |                                                  |
| Sporulation stage II protein D                                    | 6.2               |                                                  |

|                                                          |     |                                                              |
|----------------------------------------------------------|-----|--------------------------------------------------------------|
| Sporulation stage III, transcriptional regulator SpoIIID | 9.6 |                                                              |
| Anti-sigma F factor                                      | 8.6 | (EC:2.7.11.1)                                                |
| Sporulation sigma factor SigF                            | 7.7 | stage II sporulation protein AB                              |
| Sporulation stage V, protein AC                          | 6.2 |                                                              |
| Stage V sporulation protein AD                           | 5.4 |                                                              |
| Sporulation stage V, protein AE                          | 9.4 |                                                              |
| Stage II sporulation P family protein                    | 6.0 |                                                              |
| Putative stage IV sporulation YqfD                       | 9.4 |                                                              |
| Sporulation sigma factor SigK                            | 9.2 | RNA polymerase sporulation-specific sigma factor             |
| Peptidase U4, sporulation factor SpoIIGA                 | 8.8 |                                                              |
| Sporulation sigma factor SigE                            | 8.8 | RNA polymerase sporulation-specific sigma factor             |
| Sporulation sigma factor SigG                            | 8.7 | RNA polymerase sporulation-specific sigma factor             |
| Sporulation protein YlmC/YmxH                            | 5.0 |                                                              |
| Sporulation stage IV, protein A                          | 4.9 |                                                              |
| Sporulation integral membrane protein YlbJ               | 9.3 |                                                              |
| Stage V sporulation protein S                            | 8.9 |                                                              |
| Sporulation protein YtaF                                 | 8.4 |                                                              |
| Sporulation protease LonB                                | 6.1 | EC:3.4.21.53                                                 |
| Sporulation stage V, protein B                           | 9.2 |                                                              |
| Sporulation protein YtxC                                 | 4.9 |                                                              |
| Stage V sporulation protein D                            | 5.5 | EC:2.4.1.129 sporulation-specific penicillin binding protein |
| Stage V sporulation protein E                            | 9.4 | cell division protein FtsW                                   |
| Sporulation stage III, protein AA                        | 8.3 |                                                              |
| Stage III sporulation protein SpoAB                      | 5.2 |                                                              |
| Stage III sporulation AC family protein                  | 6.5 |                                                              |
| Sporulation stage III, protein AD                        | 6.1 |                                                              |
| Sporulation stage III, protein AE                        | 8.2 |                                                              |
| Sporulation stage III, protein AF                        | 6.4 |                                                              |
| Sporulation stage III, protein AG                        | 7.6 |                                                              |
| Stage III sporulation protein AH                         | 4.8 |                                                              |
| Peptidase S55                                            | 6.9 | [EC:3.4.21.116]<br>stage IV sporulation protein B            |
| Sporulation protein YtfJ                                 | 4.8 |                                                              |
| Sporulation stage II, protein M                          | 9.5 |                                                              |
| ECF subfamily RNA polymerase Sigma-24 factor             | 6.1 | RNA polymerase sporulation-specific sigma factor             |

|                           |     |                |
|---------------------------|-----|----------------|
| Sporulation protein YunB  | 8.8 |                |
| Sporulation protease LonC | 6.7 | [EC:3.4.21.53] |

### Membrane Transport: ABC transporters

| <b>Gene/protein (Definition)</b>                                                | <b>Isoelectric point</b> | <b>Note (Orthology)</b>                                                                                                                                                                                                                                                        |
|---------------------------------------------------------------------------------|--------------------------|--------------------------------------------------------------------------------------------------------------------------------------------------------------------------------------------------------------------------------------------------------------------------------|
| Sulfate ABC transporter, periplasmic Sulfate-binding protein                    | 4.8                      | sulfate transport system substrate-binding protein                                                                                                                                                                                                                             |
| Sulfate ABC transporter, inner Membrane subunit CysT                            | 9.7                      | sulfate transport system permease protein                                                                                                                                                                                                                                      |
| Sulfate ABC transporter, inner Membrane subunit CysW                            | 10                       | sulfate transport system permease protein                                                                                                                                                                                                                                      |
| Sulfate ABC transporter, ATPase subunit                                         | 6.7                      | sulfate transport system ATP-binding protein<br>[EC:3.6.3.25]                                                                                                                                                                                                                  |
| NMT1/THI5-like protein                                                          | 4.5                      | sulfonate/nitrate/taurine transport system<br>substrate-binding protein                                                                                                                                                                                                        |
| ABC transporter, periplasmic-binding, putative                                  | 9.5                      | sulfonate/nitrate/taurine transport system<br>substrate-binding protein                                                                                                                                                                                                        |
| Aliphatic sulfonates family ABC transporter, periplasmic ligand-binding protein | 5.4                      | sulfonate/nitrate/taurine transport system<br>substrate-binding protein                                                                                                                                                                                                        |
| Binding-protein-dependent transport systems inner membrane component            | 8.7                      | sulfonate/nitrate/taurine transport system permease protein<br>osmoprotectant transport system permease protein<br>lactose/L-arabinose transport system permease protein<br>D-methionine transport system permease protein<br>peptide/nickel transport system permease protein |
| ABC transporter related                                                         | 4.7-9.8                  | sulfonate/nitrate/taurine transport system ATP-binding protein                                                                                                                                                                                                                 |

|  |  |                                                                                                                                                                                                                                                                                                                                                                                                                                                                                                                                                                                                                                                                                                                                                                                                                                                                           |
|--|--|---------------------------------------------------------------------------------------------------------------------------------------------------------------------------------------------------------------------------------------------------------------------------------------------------------------------------------------------------------------------------------------------------------------------------------------------------------------------------------------------------------------------------------------------------------------------------------------------------------------------------------------------------------------------------------------------------------------------------------------------------------------------------------------------------------------------------------------------------------------------------|
|  |  | <p>maltose/maltodextrin transport system ATP-binding protein</p> <p>putative multiple sugar transport system ATP-binding protein</p> <p>ribose transport system ATP-binding protein</p> <p>methyl-galactoside transport system ATP-binding protein</p> <p>D-xylose transport system ATP-binding protein</p> <p>putative glutamine transport system ATP-binding protein</p> <p>branched-chain amino acid transport system ATP-binding protein</p> <p>branched-chain amino acid transport system ATP-binding protein</p> <p>D-methionine transport system ATP-binding protein</p> <p>iron complex transport system ATP-binding protein</p> <p>zinc transport system ATP-binding protein</p> <p>cobalt/nickel transport system ATP-binding protein</p> <p>antibiotic transport system ATP-binding protein</p> <p>lipopolysaccharide transport system ATP-binding protein</p> |
|--|--|---------------------------------------------------------------------------------------------------------------------------------------------------------------------------------------------------------------------------------------------------------------------------------------------------------------------------------------------------------------------------------------------------------------------------------------------------------------------------------------------------------------------------------------------------------------------------------------------------------------------------------------------------------------------------------------------------------------------------------------------------------------------------------------------------------------------------------------------------------------------------|

|                                                                       |     |                                                                                                                                                                                                                                                                                           |
|-----------------------------------------------------------------------|-----|-------------------------------------------------------------------------------------------------------------------------------------------------------------------------------------------------------------------------------------------------------------------------------------------|
|                                                                       |     | ATP-binding cassette, subfamily B, bacterial MsbA<br><br>macrolide transport system permease protein<br><br>macrolide transport system ATP-binding protein                                                                                                                                |
| Molybdenum ABC transporter, periplasmic molybdate-binding protein     | 4.8 | molybdate transport system substrate-binding protein                                                                                                                                                                                                                                      |
| Molybdate ABC transporter, inner Membrane subunit                     | 9.7 | molybdate transport system permease protein                                                                                                                                                                                                                                               |
| Extracellular solute-binding protein, family 1                        | 4.6 | spermidine/putrescine transport system substrate-binding protein<br><br>lactose/L-arabinose transport system substrate-binding protein<br><br>sorbitol/mannitol transport system substrate-binding protein                                                                                |
| Ornithine carbamoyltransferase                                        | 5.2 | spermidine/putrescine transport system permease protein                                                                                                                                                                                                                                   |
| Spermidine/putrescine ABC transporter ATPase subunit                  | 5.4 | spermidine/putrescine transport system ATP-binding protein [EC:3.6.3.31]                                                                                                                                                                                                                  |
| Substrate-binding region of ABC-type glycine betaine transport system | 8.8 | osmoprotectant transport system substrate-binding protein<br>osmoprotectant transport system permease protein                                                                                                                                                                             |
| Monosaccharide-transporting ATPase                                    | 9.5 | putative multiple sugar transport system substrate-binding protein<br><br>putative multiple sugar transport system permease protein<br><br>ribose transport system permease protein<br><br>methyl-galactoside transport system permease protein<br><br>D-xylose transport system permease |



|                                                                    |     |                                                                                                                    |
|--------------------------------------------------------------------|-----|--------------------------------------------------------------------------------------------------------------------|
|                                                                    |     | protein                                                                                                            |
| Periplasmic binding protein/LacI transcriptional regulator         | 4.8 | ribose transport system substrate-binding protein<br>methyl-galactoside transport system substrate-binding protein |
| ABC-type sugar transport system periplasmic component-like protein | 5.1 | ribose transport system substrate-binding protein                                                                  |
| Periplasmic binding protein/LacI Transcriptional regulator         | 4.8 | L-arabinose transport system substrate-binding protein                                                             |
| D-xylose ABC transporter, periplasmic substrate-binding protein    | 4.9 |                                                                                                                    |
| Phosphate binding protein                                          | 4.8 | phosphate transport system substrate-binding protein                                                               |
| Phosphate ABC transporter, inner Membrane subunit PstC             | 9.7 | phosphate transport system permease protein                                                                        |
| Phosphate ABC transporter, inner Membrane subunit PstA             | 9.9 | phosphate transport system permease protein                                                                        |
| Phosphate ABC transporter, ATPase subunit                          | 5.4 | phosphate transport system ATP-binding protein                                                                     |
| Extracellular ligand-binding receptor                              | 4.9 | branched-chain amino acid transport system substrate-binding protein                                               |
| Inner-membrane translocator                                        | 9.8 | branched-chain amino acid transport system permease protein                                                        |
| NlpA lipoprotein                                                   | 4.9 | D-methionine transport system substrate-binding protein                                                            |
| Lipoprotein, YaeC family                                           | 4.9 | D-methionine transport system substrate-binding protein                                                            |
| Extracellular solute-binding protein, family 5                     | 4.6 | peptide/nickel transport system substrate-binding protein                                                          |
| Oligopeptide/dipeptide ABC transporter, ATPase subunit             | 5.7 | peptide/nickel transport system ATP-binding protein                                                                |
| Periplasmic binding protein                                        | 5.0 | iron complex transport system substrate-binding protein                                                            |
| Transport system permease protein                                  | 9.1 | iron complex transport system permease protein                                                                     |
| Periplasmic solute binding protein                                 | 4.6 | zinc transport system substrate-binding protein                                                                    |
| ABC-3 protein                                                      | 8.3 | zinc transport system permease protein                                                                             |
| Cobalt transport protein CbiM                                      | 6.8 | cobalt/nickel transport system permease protein                                                                    |
| Cobalamin biosynthesis protein CbiM                                | 8.6 | cobalt/nickel transport system permease protein                                                                    |

|                                                     |     |                                                    |
|-----------------------------------------------------|-----|----------------------------------------------------|
| Cobalt transport protein                            | 6.8 | cobalt/nickel transport system permease protein    |
| Cobalt ABC transporter, inner membrane subunit CbiQ | 9.1 | cobalt/nickel transport system permease protein    |
| Antibiotic transport-associated permease SpaG/MutG  | 8.3 | antibiotic transport system permease protein       |
| Lantibiotic permease protein SpaE/MutE              | 9.6 | antibiotic transport system permease protein       |
| Protein of unknown function DUF214                  | 8.8 | cell division transport system permease protein    |
| Cell division ATP-binding protein FtsE              | 9.0 | cell division transport system ATP-binding protein |

### Phosphotransferase system (PTS)

| <b>Gene/protein (Definition)</b>                      | <b>Isoelectric point</b> | <b>Note (Orthology)</b>                                                                                                                                                                                                |
|-------------------------------------------------------|--------------------------|------------------------------------------------------------------------------------------------------------------------------------------------------------------------------------------------------------------------|
| Phosphoenolpyruvate-protein phosphotransferase        | 4.6                      | phosphotransferase system, enzyme I, PtsI [EC:2.7.3.9]                                                                                                                                                                 |
| PTS system, glucose subfamily, IIA subunit            | 6.2                      | PTS system, glucose-specific IIA component [EC:2.7.1.69]<br>PTS system, D-glucosamine-specific IIB component<br>PTS system, D-glucosamine-specific IIC component<br>PTS system, beta-glucosides-specific IIA component |
| PTS system, N-acetylglucosamine-specific IIBC subunit | 9.0                      | PTS system, N-acetylglucosamine-specific IIB component [EC:2.7.1.69]<br>PTS system, N-acetylglucosamine-specific IIC component                                                                                         |
| Phosphotransferase system, EIIC                       | 9.5                      | PTS system, sucrose-specific IIB component [EC:2.7.1.69]<br>PTS system, sucrose-specific IIC component                                                                                                                 |
| PTS system, beta-glucoside-specific IIABC subunit     | 7.7                      | PTS system, beta-glucosides-specific IIA component [EC:2.7.1.69]<br>PTS system, beta-glucosides-specific IIB component<br>PTS system, beta-glucosides-specific IIC component                                           |
| Cellobiose/arbutin/salicin-specific PTS               | 9.2                      | PTS system, arbutin-, cellobiose-, and                                                                                                                                                                                 |

|                                                                        |     |                                                                                                                       |
|------------------------------------------------------------------------|-----|-----------------------------------------------------------------------------------------------------------------------|
| system components IIBC                                                 |     | salicin-specific IIB component [EC:2.7.1.69]<br>PTS system, arbutin-, cellobiose-, and salicin-specific IIC component |
| PTS system, trehalose-specific IIBC subunit                            | 9.6 | PTS system, trehalose-specific IIB component [EC:2.7.1.69]<br>PTS system, trehalose-specific IIC component            |
| PTS system, alpha-glucoside-specific IIBC subunit                      | 8.2 | PTS system, arbutin-like IIB component [EC:2.7.1.69]<br>PTS system, arbutin-like IIC component                        |
| Phosphotransferase system PTS, lactose/cellobiose-specific IIA subunit | 5.4 | PTS system, cellobiose-specific IIA component [EC:2.7.1.69]                                                           |
| Phosphotransferase system, lactose/cellobiose-specific IIB subunit     | 6.2 | PTS system, cellobiose-specific IIB component [EC:2.7.1.69]                                                           |
| PTS system, lactose/cellobiose family IIC subunit                      | 9.2 | PTS system, cellobiose-specific IIC component                                                                         |
| Phosphoenolpyruvate-dependent sugar phosphotransferase system, EIIA 2  | 6.3 | PTS system, mannitol-specific IIA component [EC:2.7.1.69]                                                             |
| PTS system, mannitol-specific IIC subunit                              | 8.6 | PTS system, mannitol-specific IIB component [EC:2.7.1.69]<br>PTS system, mannitol-specific IIC component              |
| PTS system, mannose/fructose/sorbose family, IIA subunit               | 6.1 | PTS system, mannose-specific IIA component [EC:2.7.1.69]<br>PTS system, mannose-specific IIB component [EC:2.7.1.69]  |
| Phosphotransferase system PTS, sorbose-specific IIC subunit            | 4.8 | PTS system, mannose-specific IIC component                                                                            |
| PTS system, mannose/fructose/sorbose family, IIC subunit               | 5.7 | PTS system, mannose-specific IIC component                                                                            |
| PTS system, mannose/fructose/sorbose family, IID subunit               | 9.9 | PTS system, mannose-specific IID component                                                                            |
| PTS system fructose subfamily IIA component                            | 6.1 | PTS system, N acetylgalactosamine-specific IIA component [EC:2.7.1.69]                                                |
| N-acetylgalactosamine-specific PTS system transporter subunit IIB      | 6.8 | PTS system, galactosamine-specific IIB component [EC:2.7.1.69]                                                        |
| N-acetylgalactosamine-specific PTS                                     | 4.6 | PTS system, galactosamine-specific                                                                                    |

|                                                                    |     |                                                                                                                                                                                 |
|--------------------------------------------------------------------|-----|---------------------------------------------------------------------------------------------------------------------------------------------------------------------------------|
| system transporter subunit IIC                                     |     | IIC component                                                                                                                                                                   |
| N-acetylgalactosamine-specific PTS system transporter subunit IID  | 9.4 | PTS system, galactosamine-specific IID component                                                                                                                                |
| PTS system, glucitol/sorbitol-specific IIA subunit                 | 4.7 | PTS system, glucitol/sorbitol-specific IIA component<br>[EC:2.7.1.69]                                                                                                           |
| PTS system, glucitol/sorbitol-specific, IIB subunit                | 8.0 | PTS system, glucitol/sorbitol-specific IIB component<br>[EC:2.7.1.69]<br>PTS system, glucitol/sorbitol-specific IIC component                                                   |
| PTS system, glucitol/sorbitol-specific, IIC subunit                | 9.4 | PTS system, glucitol/sorbitol-specific IIC component                                                                                                                            |
| Putative PTS IIA-like nitrogen-regulatory protein PtsN             | 5.1 | PTS system, galactitol-specific IIA component<br>[EC:2.7.1.69]                                                                                                                  |
| PTS system, galactitol-specific IIB component, putative            | 5.4 | PTS system, galactitol-specific IIB component<br>[EC:2.7.1.69]                                                                                                                  |
| PTS system galactitol-specific IIC component                       | 9.1 | PTS system, galactitol-specific IIC component                                                                                                                                   |
| Phosphotransferase system, lactose/cellobiose-specific IIB subunit | 6.2 | PTS system, ascorbate-specific IIB component<br>[EC:2.7.1.69]                                                                                                                   |
| UlaA, sgaT, Ascorbate-specific PTS system enzyme IIC               | 8.6 | PTS system, ascorbate-specific IIC component                                                                                                                                    |
| PTS system, fructose subfamily, IIC subunit                        | 6.6 | PTS system, fructose-specific IIA component<br>[EC:2.7.1.69]<br>PTS system, fructose-specific IIB component<br>[EC:2.7.1.69]<br><br>PTS system, fructose-specific IIC component |

**Table S3:** Full list of proteins which were significantly down-regulated in Ca<sup>2+</sup>-supplemented *C. beijerinckii* 8052 ABE fermentation relative to the untreated cells.

| Spot # | Protein ID     | PI  | Description/cellular function                                                  | Fold change | P value (T-test) |
|--------|----------------|-----|--------------------------------------------------------------------------------|-------------|------------------|
| 441    | YP_001310387.1 | 5.7 | Hypothetical protein                                                           | -11.5       | 0.034            |
| 243    | YP_001307566.1 | 5.3 | Sporulation stage II protein D                                                 | -6.7        | 0.001            |
| 76     | YP_001311201.1 | 5.3 | Pullulanase/glycoside hydrolase family                                         | -6.1        | 0.003            |
| 450    | YP_001309441.1 | 5.1 | Rubrerythrin/ruberydoxin                                                       | -4.9        | 0.007            |
| 244    | YP_001311728.1 | 5.4 | Polysaccharide deacetylase                                                     | -4.7        | 0.003            |
| 51     | YP_001307620.1 | 5.2 | Hypothetical protein with a nucleoside triphosphate hydrolase conserved domain | -4.3        | 0.032            |
| 22     | YP_001309233.1 | 5.5 | Arsenite-activated ATPase                                                      | -4.2        | 0.004            |
| 375    | YP_001310303.1 | 5.9 | Chloramphenicol O-acetyltransferase                                            | -4.1        | 0.005            |
| 498    | YP_001310261.1 | 6.2 | TetR family transcriptional regulator                                          | -4.1        | 0.000*           |
| 25     | YP_001309141.1 | 6.0 | Exonuclease/nucleoside triphosphate/DEAD-like helicase/DNA polymeras           | -3.2        | 0.045            |
| 48     | YP_001310746.1 | 5.3 | Dual specificity protein-tyrosine phosphatase                                  | -2.7        | 0.003            |

|     |                |     |                                                                                 |      |       |
|-----|----------------|-----|---------------------------------------------------------------------------------|------|-------|
| 53  | YP_001307365.1 | 6.3 | Sigma-54 factor interaction domain-containing protein/transcriptional regulator | -2.4 | 0.016 |
| 27  | YP_001310172.1 | 5.7 | PAS/PAC sensor hybrid histidine kinase                                          | -2.3 | 0.013 |
| 57  | YP_001310872.1 | 6.0 | Molybdopterin-guanine dinucleotide biosynthesis protein B                       | -1.8 | 0.022 |
| 67  | YP_001307436.1 | 6.4 | Hypothetical protein                                                            | -4.2 | 0.027 |
| 94  | YP_001307495.1 | 6.5 | UvrD/REP helicase                                                               | -1.9 | 0.004 |
| 128 | YP_001308846.1 | 5.3 | Putative prophage ps3 protein 01                                                | -2.3 | 0.026 |
| 131 | YP_001310397.1 | 6.2 | Diguanylate cyclase                                                             | -1.7 | 0.008 |
| 133 | YP_001309899.1 | 6.4 | ABC transporter related                                                         | -1.9 | 0.037 |
| 142 | YP_001308978.1 | 6.4 | SufS subfamily cysteine desulfurase                                             | -2.1 | 0.017 |
| 148 | YP_001308078.1 | 6.5 | Hypothetical protein Cbei_0938                                                  | -1.8 | 0.031 |
| 161 | YP_001312096.1 | 6.2 | Ammonium transporter                                                            | -2.2 | 0.001 |
| 163 | YP_001309830.1 | 6.0 | XRE family transcriptional regulator                                            | -3.4 | 0.013 |
| 169 | YP_001311681.1 | 6.3 | Diguanylate cyclase                                                             | -1.8 | 0.001 |
| 177 | YP_001310166.1 | 5.7 | D-Galactose-binding periplasmic protein precursor                               | -1.7 | 0.002 |
| 182 | YP_001309690.1 | 7.0 | dTDP-Glucose 4,6 dehydratase                                                    | -1.7 | 0.018 |
| 199 | YP_001308366.1 | 5.1 | Regulatory protein, LacI                                                        | -2.6 | 0.034 |

|     |                |     |                                                        |      |       |
|-----|----------------|-----|--------------------------------------------------------|------|-------|
| 203 | YP_001307470.1 | 5.3 | 8-Oxoguanine DNA glycosylase domain-containing protein | -3.2 | 0.020 |
| 211 | YP_001307183.1 | 6.3 | Radical SAM domain-containing protein                  | -2.5 | 0.012 |
| 228 | YP_001309511.1 | 5.3 | Membrane dipeptidase                                   | -2.2 | 0.004 |
| 238 | YP_001311919.1 | 6.5 | Hypothetical protein                                   | -2.0 | 0.016 |
| 247 | YP_001312099.1 | 6.0 | Dihydrodipicolinate synthase                           | -2.4 | 0.027 |
| 272 | YP_001310534.1 | 5.5 | Transcription activator, effector binding              | -2.8 | 0.040 |
| 278 | YP_001311727.1 | 6.4 | Hypothetical protein                                   | -1.7 | 0.028 |
| 280 | YP_001307749.1 | 5.8 | ABC transporter related                                | -2.3 | 0.015 |
| 294 | YP_001309572.1 | 5.5 | 5-Keto-4-deoxyuronate isomerase                        | -2.0 | 0.004 |
| 296 | YP_001309599.1 | 6.4 | Ribonuclease H                                         | -1.7 | 0.023 |
| 299 | YP_001308172.1 | 6.3 | RNA-binding S1 domain-containing protein               | -1.9 | 0.010 |
| 331 | YP_001311405.1 | 6.4 | Nucleotidyl transferase                                | -2.2 | 0.009 |
| 348 | YP_001307539.1 | 6.6 | Sporulation stage II, protein R                        | -3.3 | 0.012 |
| 358 | YP_001310793.1 | 6.0 | Hypothetical protein                                   | -3.1 | 0.012 |
| 370 | YP_001311478.1 | 5.6 | Hypothetical protein                                   | -2.0 | 0.037 |
| 374 | YP_001310974.1 | 5.9 | Short-chain dehydrogenase/reductase SDR                | -5.0 | 0.017 |
| 376 | YP_001307888.1 | 5.3 | Deoxyribose-phosphate aldolase                         | -2.4 | 0.004 |
| 380 | YP_001309075.1 | 5.7 | Hypothetical protein                                   | -3.8 | 0.061 |
| 389 | YP_001309653.1 | 5.8 | ExsB protein                                           | -2.1 | 0.020 |

|     |                |     |                                                                 |      |       |
|-----|----------------|-----|-----------------------------------------------------------------|------|-------|
| 394 | YP_001311520.1 | 6.1 | L-Ribulose-5-phosphate 4-epimerase                              | -3.0 | 0.026 |
| 395 | YP_001308657.1 | 5.7 | Hypothetical protein                                            | -1.8 | 0.017 |
| 405 | YP_001308594.1 | 5.7 | Hypothetical protein                                            | -2.7 | 0.037 |
| 434 | YP_001307336.1 | 5.3 | Fumarate hydratase                                              | -1.7 | 0.010 |
| 436 | YP_001311457.1 | 7.0 | Hypothetical protein                                            | -1.7 | 0.023 |
| 439 | YP_001310387.1 | 5.3 | Hypothetical protein                                            | -1.9 | 0.039 |
| 444 | YP_001307345.1 | 6.4 | Cell wall hydrolase, SleB                                       | -2.3 | 0.010 |
| 454 | YP_001310870.1 | 7.0 | 4Fe-4S ferredoxin iron-sulfur binding domain-containing protein | -1.7 | 0.039 |
| 465 | YP_001308205.1 | 5.8 | Hypothetical protein                                            | -4.1 | 0.002 |
| 466 | YP_001308171.1 | 5.7 | Carbonic anhydrase                                              | -2.3 | 0.023 |
| 471 | YP_001308947.1 | 5.2 | Hypothetical protein                                            | -2.6 | 0.014 |
| 511 | YP_001309731.1 | 6.2 | Hypothetical protein                                            | 2.4  | 0.010 |



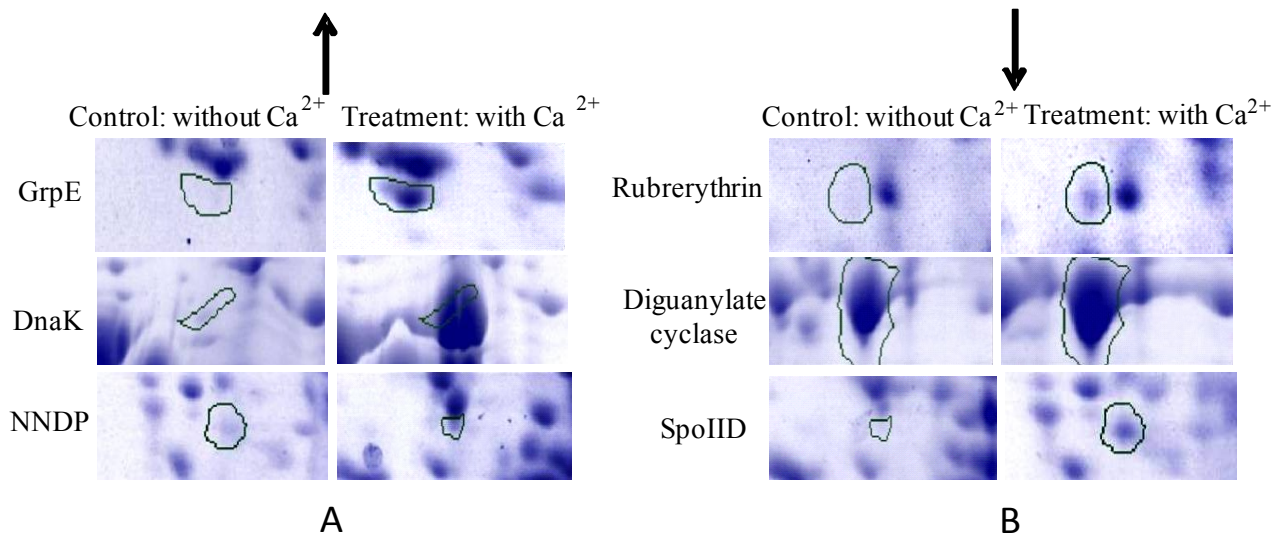

**Figure S1:** Representative expression levels of selected proteins of *C. beijerinckii* 8052, which increased (A) or decreased (B) in  $\text{Ca}^{2+}$ -treated cells compared to the untreated cells. NNDP - nicotinate-nucleotide--dimethylbenzimidazole phosphoribosyltransferase; SpoIID - sporulation stage II protein D.

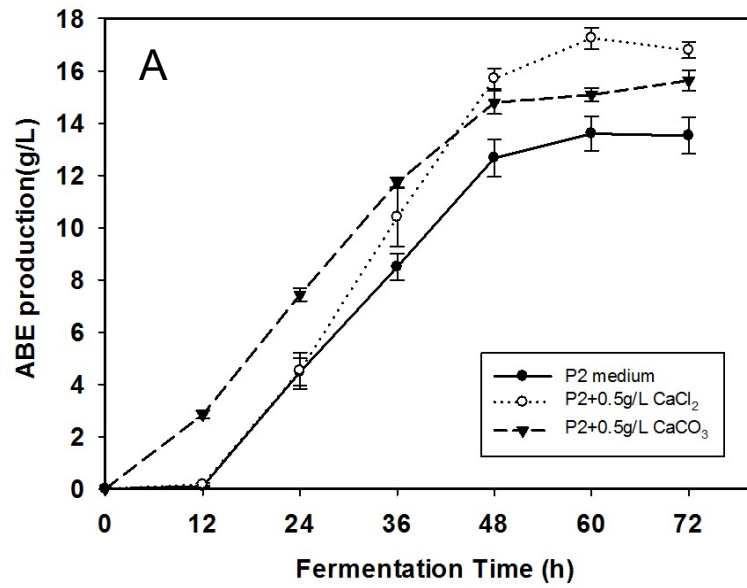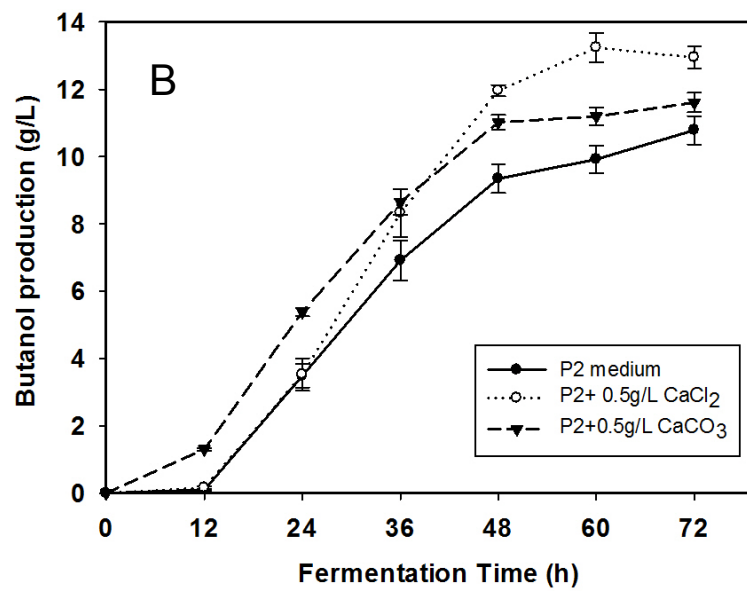

**Figure S2:** Comparison of total ABE (A) and butanol (B) profiles between batch *C. beijerinckii* NCIMB 8052 fermentations conducted in P2 medium supplemented with 0.5 g/L CaCl<sub>2</sub> and 0.5 g/L CaCO<sub>3</sub>.
